# Supplementary material for: Cytogenetic Characterization of Seven Novel satDNA Markers in Two Species of Spined Loaches (Cobitis) and Their Clonal Hybrids
Source: PubMed Central journal article supplement (PMC7348982; doi:10.3390/genes11060617), 2020-06-04
Supplement: genes-11-00617-s001.pdf [file genes-11-00617-s001.pdf]

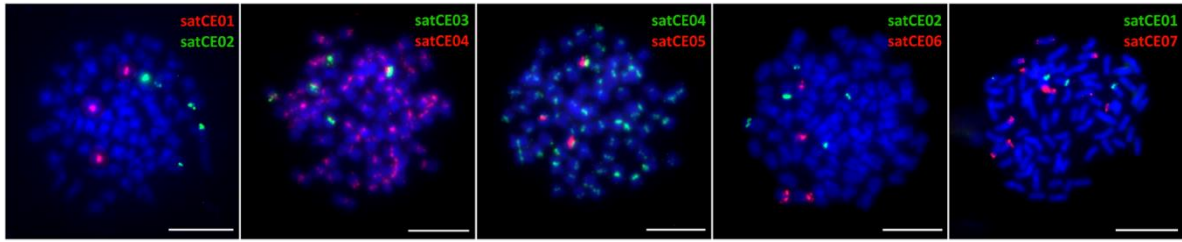

**Figure S1.** Mapping of satDNA markers on chromosomes of triploid hybrids *C. elongatoides* × 2*C. taenia*. Representative metaphases after double-coloured FISH, indicating mutual position of satCE01 – satCE07. Bars equal 10 µm.

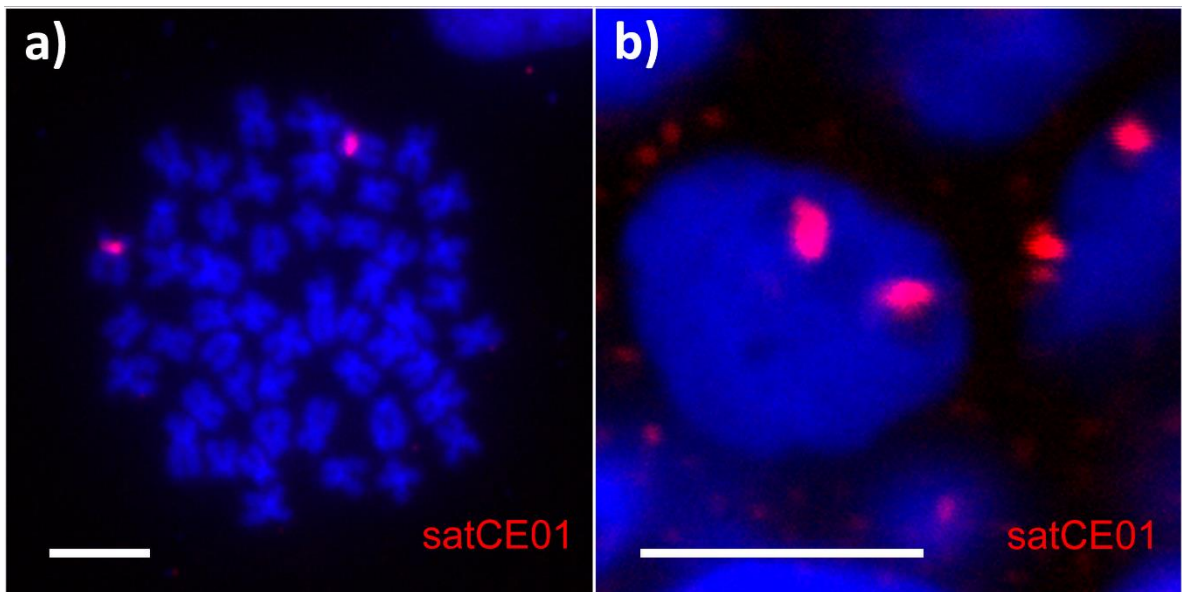

**Figure S2.** satCE01 detection in mitotic chromosomes (a) and germ cells (b) of *C. elongatoides*. Bars equal 5 µm.

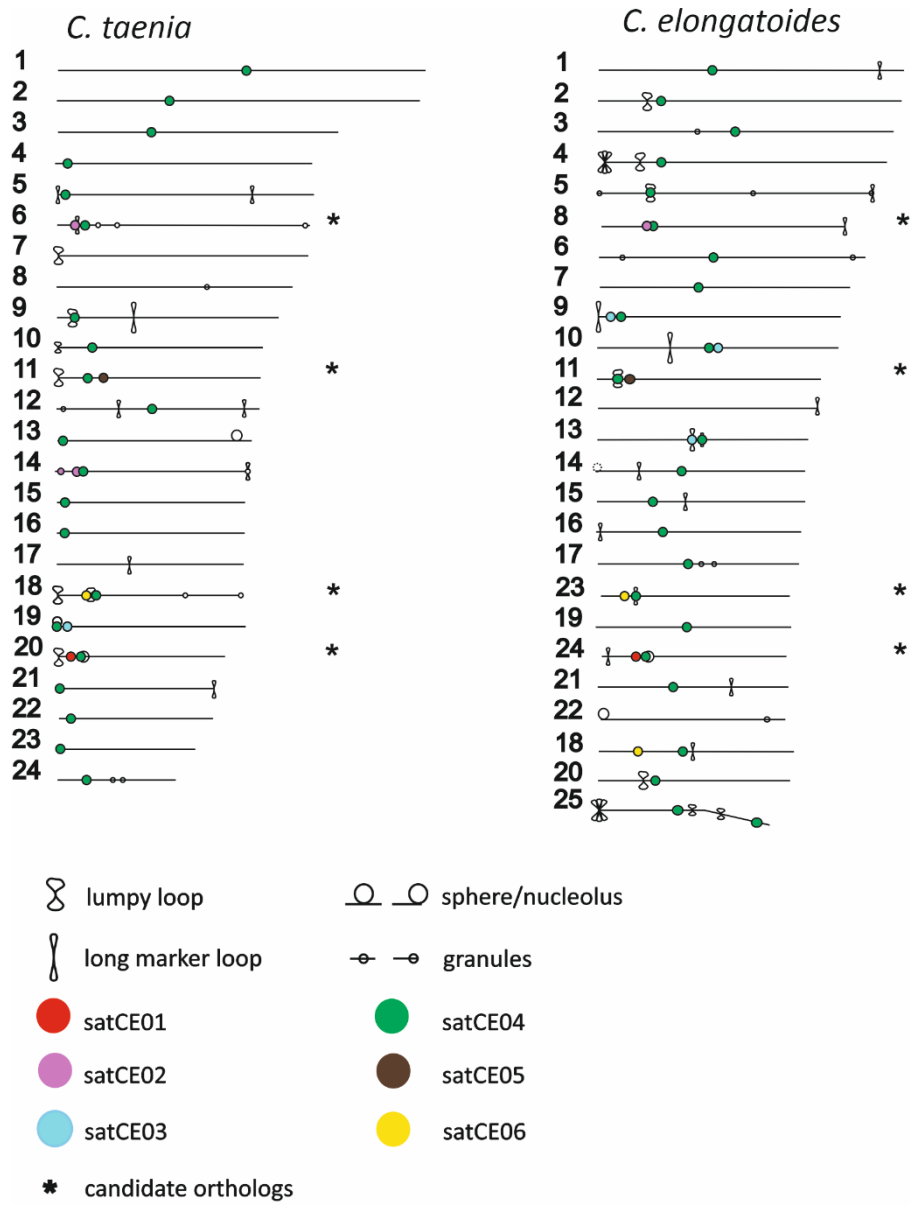

**Figure S3.** Maps of lampbrush chromosomes of *C. elongatoides* and *C. taenia*. Maps of lampbrush chromosomes with indication of relative position of selected satDNA markers. .
